# 1 Asymptomatic *Plasmodium falciparum* Carriage at the End of the Dry Season is 2 Associated with Subsequent Infection and Clinical Malaria in Eastern Gambia

## 3 Affiliations:

4 Balotin Fogang<sup>1</sup>, Lionel Lellouche<sup>1</sup>, Sukai Ceesay<sup>2</sup>, Sainabou Drammeh<sup>2</sup>, Fatou K. Jaiteh<sup>2</sup>,  
5 Marc-Antoine Guery<sup>1</sup>, Jordi Landier<sup>3</sup>, Cynthia Haanappel<sup>4</sup>, Janeri Froberg<sup>4</sup>, David Conway<sup>5</sup>,  
6 Umberto D'Alessandro<sup>2</sup>, Teun Bousema<sup>4</sup>, Antoine Claessens<sup>1,2,4</sup>

7 <sup>1</sup>LPHI, MIVEGEC, University of Montpellier, CNRS, INSERM, Montpellier, France

8 <sup>2</sup>Medical Research Council Unit The Gambia at the London School of Hygiene and Tropical  
9 Medicine, Banjul, The Gambia

10 <sup>3</sup>Aix Marseille Univ, IRD, INSERM, SESSTIM, ISSPAM, 27 boulevard Jean Moulin, 13005,  
11 Marseille, France

12 <sup>4</sup>Radboud university medical center, Radboud Institute for Health Sciences, Department of  
13 Medical Microbiology, Nijmegen, The Netherlands

14 <sup>5</sup>Department of Infection Biology, London School of Hygiene and Tropical Medicine,  
15 London, UK

16 Corresponding author: antoine.claessens@umontpellier.fr

17

## 18 Abstract

19 **Background.** Chronic carriage of asymptomatic low-density *Plasmodium falciparum*  
20 parasitaemia in the dry season may support maintenance of acquired immunity that protects  
21 against clinical malaria. However, the relationship between chronic low-density infections and  
22 subsequent risk of clinical malaria episodes remains unclear.

23 **Methods.** In a 2-years study (December 2014 to December 2016) in eastern Gambia, nine cross-  
24 sectional surveys using molecular parasite detection were performed in the dry and wet season.  
25 During the 2016 malaria transmission season, passive case detection identified episodes of  
26 clinical malaria.

27 **Results.** Among the 5,256 samples collected, 444 (8.4%) were positive for *P. falciparum*. A  
28 multivariate model identified village of residence, male sex, age  $\geq 5$  years old, anaemia, and  
29 fever as independent factors associated with *P. falciparum* parasite carriage. Infections did not  
30 cluster over time within the same households or recurred among neighbouring households.  
31 Asymptomatic parasite carriage at the end of dry season was associated with a higher risk of  
32 infection (Hazard Ratio, HR= 3.0,  $p < 0.0001$ ) and clinical malaria (HR= 1.561,  $p = 0.057$ )  
33 during the following transmission season. Age and village of residence were additional  
34 predictors of infection and clinical malaria during the transmission season.

35 **Conclusion.** Chronic parasite carriage during the dry season is associated with an increased  
36 risk of malaria infection and clinical malaria. It is unclear whether this is due to environmental  
37 exposure or to other factors.

38 **Keywords.** *Plasmodium falciparum*, asymptomatic, clinical malaria, seasonal transmission

NOTE: This preprint reports new research that has not been certified by peer review and should not be used to guide clinical practice.

## 39 Introduction

40 Malaria continues to be a significant public health challenge in several parts of the  
41 world, where it is responsible for a high burden of morbidity and mortality [1,2]. Despite the  
42 impact of standard control interventions, asymptomatic *P. falciparum* infections continue to  
43 pose a challenge to control efforts as they maintain residual transmission [3]. Where malaria  
44 transmission is seasonal, most cases of clinical malaria occur between July and December, a  
45 period covering the seasonal rains and the 2 months immediately following them, with a peak  
46 in cases in November, while the dry season (January-June) is a period of low transmission, with  
47 mainly asymptomatic chronic infections acquired during the previous transmission season  
48 [4,5].

49 As malaria transmission has declined considerably in The Gambia [1], thanks to wide  
50 scale up of vector control interventions, the prevalence of infection has become increasingly  
51 heterogeneous [6–8]. To sustain the decline in malaria transmission and move towards  
52 elimination, there is a need to evaluate and improve existing community-based interventions  
53 through ongoing epidemiological surveillance and identification of associated factors.

54 A large proportion of asymptomatic individuals at the end of the transmission season remains  
55 infected for several months, from January to June [9]. However, the relationship between these  
56 chronic infections and the risk of infection and clinical malaria during the following  
57 transmission season remains unclear, with conflicting information; some studies report a  
58 protective effect [10–13] while others a higher risk of clinical malaria [14–17] or no consistent  
59 association [6,18]. Such differences may be influenced by the age of the participants [17,18],  
60 the intensity of malaria transmission [6,18] and the number of circulating *P. falciparum* clones  
61 [13,14,19]. Importantly, variation in parasite exposure may also play a role.

62 Here, to characterise the dynamics of malaria transmission and identify associated risk  
63 factors, we conducted a total of 9 cross-sectional surveys during the dry and wet seasons,  
64 starting in December 2014. From July 2016, a longitudinal follow-up of treated asymptomatic  
65 and non-infected participants with passive *P. falciparum* detection was carried out to assess the  
66 impact of asymptomatic parasitaemia on subsequent infection and clinical malaria during the  
67 transmission season.

## 68 **Materials and methods**

### 69 **Ethical considerations**

70 The study protocol was reviewed and approved by the Gambia Government/MRC Joint  
71 Ethics Committee (SCC 1476, SCC 1318, L2015.50) and by the London School of Hygiene &  
72 Tropical Medicine ethics committee (Ref 10982). The field studies were also approved by local  
73 administrative representatives, the village chiefs. Written informed consent was obtained from  
74 participants over 18 years old and from parents/guardians for participants under 18 years.  
75 Written assent was obtained from all individuals aged 12-17 years.

76

### 77 **Study design and population**

78 The study was carried out in four villages (Madina Samako: K, Njayel: J, Sendebu: P, and  
79 Karandaba: N) in Upper River Region (URR), eastern Gambia (Figure 1A) [9,20]. Over a two-  
80 year period, two cohorts of individuals at least two years old were recruited; one cohort was  
81 followed up between December 2014 and March 2016, and the other between July and  
82 December 2016 (Figure 1B). All households were invited to participate in the study. The  
83 number of participants per household ranged from 1 to 79, with a median of 7 (Q1, Q3 4, 11).  
84 Five surveys covering the end of the transmission season (December 2014 and November and  
85 December 2015) and the following dry season (April 2015 and March 2016) were carried out  
86 in the first cohort in two-villages (J and K) (Figure 1B). Surveys on the second cohort were  
87 carried out during the 2016 transmission season (July, October, November, and December) in  
88 the four study villages (Figure 1B). During the surveys, structured questionnaires were used to  
89 record individual information (village, household, age, sex, bed net use, history of fever,  
90 temperature) from all participants. Moreover, households in the villages J and K were  
91 geolocated using a global positioning system (GPS). During the 2016 transmission season  
92 (July-December), a resident nurse delivered complimentary basic healthcare to all participants.  
93 Suspected malaria cases (axillary temperature  $> 37.5$  °C) were tested with a Rapid Diagnostic  
94 Test (CareStart) and, if positive, treated with artemether-lumefantrine.

95

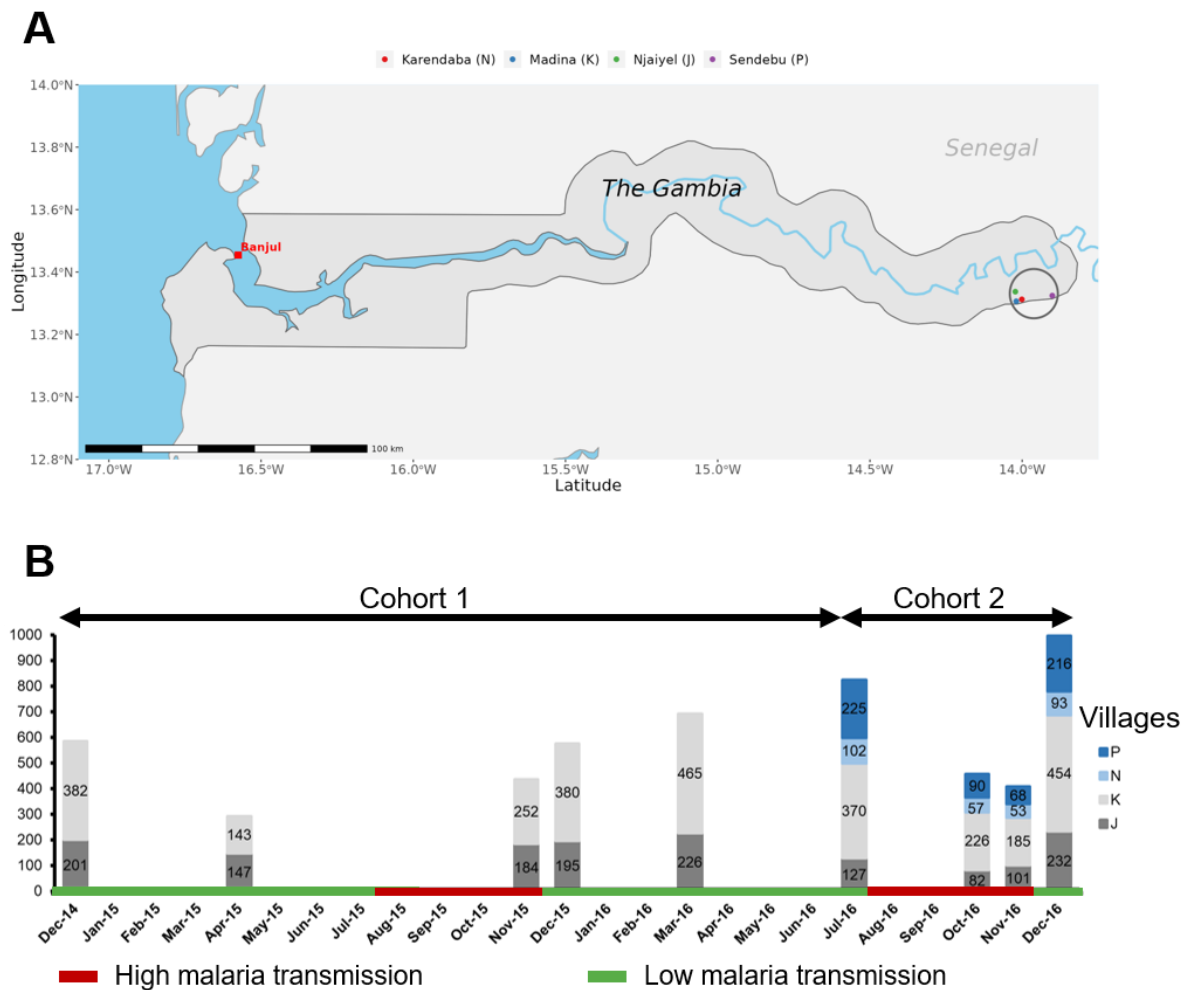

96

97 **Figure 1. Study site and design.** A) Map of The Gambia with the study site (4 villages) circled.  
 98 B) Presentation of the two cohorts and the 2-year sampling period in the four villages. The bar  
 99 charts show the cumulative number of fingerprick samples per timepoint for each village. The  
 100 green colour represents the low malaria transmission season and the red colour represents the  
 101 high transmission malaria season in The Gambia. The colours in the bars indicate village of  
 102 residence (P= blue, N= light blue, K= light grey, J= grey).

103

#### 104 Sample collection and malaria diagnostic

105 At each survey, approximately 200µl of blood was collected by fingerprick into an  
 106 EDTA-coated tube. A few drops were used for a thick blood film and dry blood spots on filter  
 107 paper (Whatman 3 Corporation, Florham Park, NJ, USA). Haemoglobin (Hb) was measured by  
 108 HaemoCue 301 machine. Blood samples from EDTA tubes were processed on the same day  
 109 for leucodepletion using a cellulose-based column (MN2100ff, similar to CF11) [21].

110 Thick blood films were stained with a 10% Giemsa solution for 10 minutes and parasite  
 111 density estimated by counting the number of parasites per at least 200 white blood cells (WBC)  
 112 and assuming 8,000 WBC/µL. Slides were considered negative if no parasites were detected by  
 113 two microscopists after reading 500 WBC. A 20 % error check was used to identify  
 114 discrepancies between slide readers. All discordant results were read by a senior microscopist  
 115 whose results were taken as final.

116 For samples collected between December 2014 and March 2016, DNA extracted from  
117 leukocyte-depleted red blood cells using the QIAgen MiniPrep kit was analyzed by nested PCR  
118 targeting *P. falciparum* 18S small subunit rRNA (ssRNA) genes [22].

119 For samples collected from July to December 2016, DNA was extracted from dry blood spot  
120 (DBS) by Chelex method [23] and analyzed by 18S small subunit of ribosomal RNA (rRNA)  
121 qPCR and *var* gene acid terminal sequence (varATS) qPCR [24], as detailed in Supplementary  
122 Figure 1.

123

## 124 **Statistical analysis**

125 Data were collected on paper-based case report forms (CRFs), double entered, and  
126 checked for errors and discrepancies before statistical analysis. Statistical analyses were  
127 performed using R studio version 4.2.3 [25]. Age was categorized into three groups: < 5 years,  
128 5–14 years and  $\geq 15$  years. Anaemia was classified as mild, moderate or severe [26]  
129 (**Supplementary Table 1**). Comparisons of proportions between groups were performed using  
130 the chi-square  $\chi^2$  test; Spearman's correlation test was used to test the association between  
131 quantitative variables. 95% confidence intervals for prevalence were calculated using standard  
132 error based on Wilson Score Interval.

133 A multivariate mixed-effects logistic regression model, implemented with the R lme4  
134 package, was used to determine factors independently associated with qPCR-detected *P.*  
135 *falciparum* infection. This modelling approach incorporates both fixed and random effects,  
136 making it suitable for analysing data with repeated or clustered observations. The mixed-effects  
137 logistic regression model assumes that observations within groups or clusters defined by  
138 random effects must be independent, and there should be no perfect separation in the data. In  
139 this model all fixed-effect variables were adjusted for clustering at different months of data  
140 collection (time of sampling), at the household level, and at the individual level, with the  
141 individual level nested within the household level. This adjustment helps mitigate potential  
142 biases stemming from temporal and household-level variability. The predictive factors (fixed-  
143 effects) included villages, age, sex, anaemia, history of fever in the past week and fever at  
144 inclusion (temperature > 37.5°C). For this analysis, only individuals in the second cohort were  
145 included as complete epidemiological information for the first cohort was not available.

146 To assess the risk factors associated with subsequent infection or the first clinical  
147 malaria episode during the transmission season, both univariate and multivariate shared frailty  
148 mixed-effects survival models were applied. These models were implemented using the R  
149 survival and coxme packages. They integrate components of survival analysis and mixed-  
150 effects modelling, taking into consideration the inherent clustering or interdependence of  
151 observations within groups or clusters. The explained variables in separated models included  
152 the occurrence of infection or clinical malaria during the transmission season. In these models,  
153 individuals were clustered according to the timing of reinfection or the onset of clinical malaria,  
154 with each interval spanning one month. The random effect in the model pertained to households,  
155 and the covariates included the infection status at the end of dry season, villages, age, sex,  
156 anaemia status, history of fever in the past week, fever at inclusion (temperature > 37.5°C).  
157 Kaplan-Meier survival curves were used to visualize the progression of malaria incidence or  
158 clinical cases during the transmission season.

159            Spatial analysis of clusters of *Plasmodium* infections (hotspot) was performed using the  
160 Bernoulli method in SaTScan version 10.1.2 [27]. In all analyses, P values < 0.05 were  
161 considered statistically significant. All the graphs were performed using R studio.

162 **Results**

163 **Characteristics of the study cohorts**

164 Over a period of 2 years, 5256 blood samples were collected from 1471 individuals aged 2 to  
 165 85 years (Fig. 1). The first cohort included 1003 participants and the second cohort 1284 participants,  
 166 with 789 of them in both cohorts (Table 1). 46.3% (458) of cohort 1 were males and the median age  
 167 was 11 years (Q1, Q3 5.5, 27). In the cohort 2, the median age was 12 years (Q1, Q3 6, 29), with  
 168 more females than males. Anaemia prevalence was 42.8%, mostly mild (22.5%) and moderate  
 169 (18.9%), with few cases of severe anaemia (1.4%) (Table 1). Fever at inclusion was rare (0.8%). Bed  
 170 net use was high (76.4%).

171 **Table 1 : Characteristics of the study population**

| <b>Characteristics</b>                       | <b>Cohort 1: December 2014 –<br/>March 2016, % (n/N)</b> | <b>Cohort 2: July 2016 –<br/>December 2016, % (n/N)</b> |
|----------------------------------------------|----------------------------------------------------------|---------------------------------------------------------|
| <b>Male sex</b>                              | 46.3 (458/989)                                           | 44.1 (565/1280)                                         |
| <b>Villages</b>                              |                                                          |                                                         |
| J                                            | 33.4 (335/1003)                                          | 20.6 (264/1284)                                         |
| K                                            | 66.6 (668/1003)                                          | 48.4 (622/1284)                                         |
| N                                            | -                                                        | 11.1 (142/1284)                                         |
| P                                            | -                                                        | 19.9 (256/1284)                                         |
| <b>Age groups (years)</b>                    |                                                          |                                                         |
| < 5                                          | 22.1 (219/1003)                                          | 16.2 (207/1280)                                         |
| 5-14                                         | 33.9 (335/1003)                                          | 39.3 (503/1280)                                         |
| >15                                          | 44.0 (435/1003)                                          | 44.5 (570/1280)                                         |
| <b>Anaemia*</b>                              |                                                          |                                                         |
| Non-anaemic                                  | -                                                        | 57.2 (688/1203)                                         |
| Mild                                         | -                                                        | 22.5 (271/1203)                                         |
| Moderate                                     | -                                                        | 18.9 (227/1203)                                         |
| Severe                                       | -                                                        | 1.4 (17/1203)                                           |
| <b>Slept under a LLIN last<br/>night</b>     | -                                                        | 76.4 (916/1195)                                         |
| <b>History of fever in the past<br/>week</b> | -                                                        | 4.0 (48/1195)                                           |
| <b>Fever at inclusion</b>                    | -                                                        | 0.8 (10/860)                                            |

172 \*Anaemia is classified based on age and sex (WHO, 2011). LLIN: Long-lasting insecticidal net; - = not determined

173

174 ***Plasmodium falciparum* prevalence in cohort 1**

175 Between December 2014 and March 2016, 155 (6%) of 2575 samples collected were positive.  
 176 Prevalence varied substantially over time, between 1.7% and 5.4% during the dry season and up to  
 177 14.4% during the transmission season (Supplementary Figure 2). Children under 5 years of age were  
 178 less likely to be infected (Supplementary Figure 2), possibly reflecting the effects of Seasonal Malaria  
 179 Chemoprevention (SMC). Parasite prevalence in older children and adults was similar and peaked  
 180 towards the end of the transmission season (Supplementary Figure 2).

## 181 **VarATS qPCR is more sensitive than 18S qPCR and microscopy**

182 To increase the sensitivity of the *P. falciparum* detection relative to microscopy, two  
183 quantitative PCR approaches targeting the 18S locus of the conserved small subunit of ribosomal  
184 RNA (18S rRNA, 5-8 copies/genomes) and the acidic terminal sequence of the var gene (varATS,  
185 ~60 copies/genomes) were evaluated using a set of samples from cohort 2. Using serial dilutions of  
186 the laboratory-adapted *P. falciparum* 3D7 strain to determine analytical sensitivity, varATS reached  
187 the limit of detection (LOD) of 0.22 parasites/ $\mu$ L of blood and was around 10 times more sensitive  
188 than standard 18S rRNA qPCR with the LOD of 2.2 parasites/ $\mu$ L (Supplementary Figure 1). Out of  
189 1202 fingerprick samples from this cohort screened by the 3 techniques, 11.7% (141), 10.1% (121)  
190 and 3.9% (47) samples were positive for *P. falciparum* using varATS, 18S rRNA qPCR and light  
191 microscopy, respectively (Figure 2A). Of 166 *Plasmodium* infections detected by the three diagnostic  
192 tests combined, 18.9% (35) were only detected by varATS, while 10.2% (17) ( $p= 0.0066$ ) and 4.2%  
193 (7) ( $p< 0.0001$ ) were detected only by 18S rRNA qPCR and microscopy, respectively (Figure 2B and  
194 Supplementary Figure 3). There was a high level of agreement between varATS and 18S rRNA  
195 qPCR, with 95.3% (1146 varATS+/18SRNA+ or varATS-/18SRNA-) samples with the same results  
196 for both methods (Supplementary Figure 3). Parasite densities determined by varATS and 18S rRNA  
197 qPCR correlated strongly with parasitemia quantified by microscopy ( $r= 0.76$ ,  $P< 0.0001$  and  $r= 0.86$ ,  
198  $P< 0.0001$  for VarATS and 18S rRNA qPCR, respectively), as well as with each other ( $r= 0.94$ ,  $P<$   
199  $0.0001$ ) (Figure 2C). Because of the high concordance between the two molecular methods varATS  
200 and 18S rRNA qPCR, results from the two molecular *Plasmodium* detection tools were combined in  
201 a single analysis.



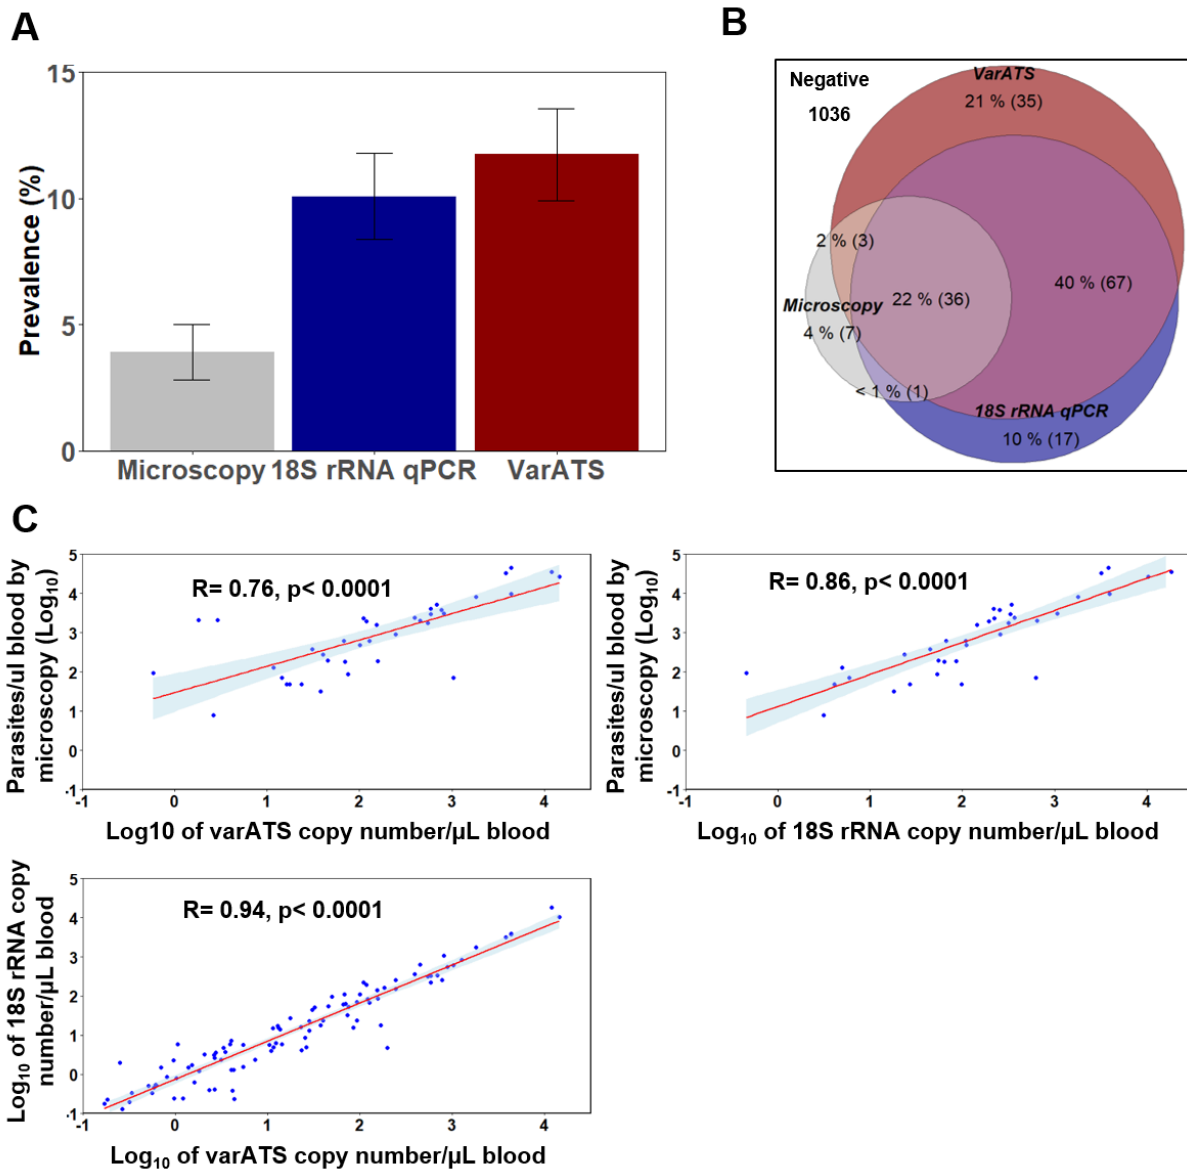

202  
 203 **Figure 2. *Plasmodium* detection by different diagnostic tools.** A) Proportion of *P. falciparum*  
 204 detected with different diagnostic methods. B) Venn diagram of *Plasmodium* positivity by varATS,  
 205 18S rRNA qPCR and/or microscopy. C) Correlation in parasitaemia between diagnostic tools. Error  
 206 bars in Fig A correspond to 95% confidence interval for estimated prevalence. Spearman rank  
 207 correlation (panel C) is presented as the best fit line and the coefficient (r), as well as the p-value (p),  
 208 are shown for each correlation pair between parasitaemia. LM: light microscopy. qPCR: quantitative  
 209 polymerase chain reaction. rRNA: Ribosomal ribonucleic acid. ATS: acidic terminal segment.

210  
 211 ***Plasmodium falciparum* prevalence in cohort 2**

212 *P. falciparum* prevalence was 9.3% (77/824) in July, 9.7% (44/455) in October, 20.6%  
 213 (84/407) in November, and 12.9% (128/995) in December. This trend was observed in all age groups  
 214 (Figure 3A). As shown in Figure 3A, children under 5 years of age had the lowest prevalence while  
 215 older children the highest prevalence (Figure 3A). Bednet usage was high in all age groups (81% in  
 216 < 5, 74% in 5-14, 77% in ≥ 15 years). Median varATS parasitaemia was usually higher in the older  
 217 children than adults and young children (5-14 vs <5 years, p= 0.1553; 5-14 vs ≥15 years, p< 0.0001),  
 218 but not in all surveys (Figure 3B).

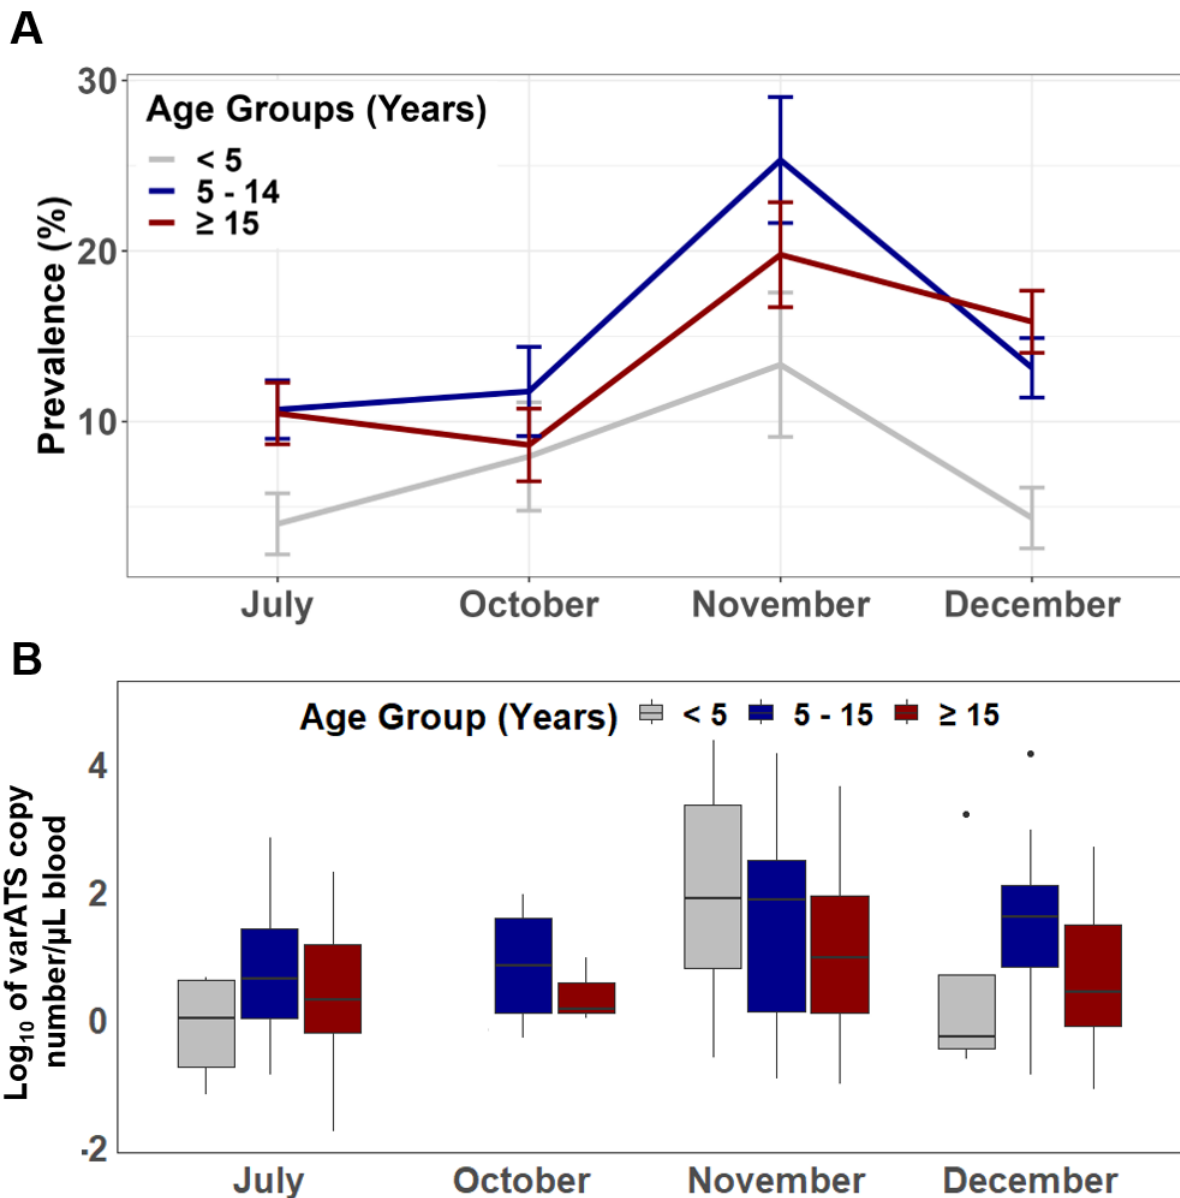

219

220

221

222

223

224

225

226

227

228

229

230

231

232

233

**Figure 3. Trend analysis for *P. falciparum* infection prevalence (A) and parasitaemia (B) by age groups in the second cohort (2016).** In A, error bars represent 95% confidence intervals for prevalence.. Box in B plots representing interquartile ranges (25th, median and 75th percentile, whisker percentile (1st and 99th)). (B) Parasite density by varATS was not available for October in the <5 year group.

### Risk factors associated with *P. falciparum* infection

A multivariate mixed-effects logistic regression model shows that sex, age, anaemia, fever at inclusion, and village of residence were independent factors associated with *P. falciparum* infections (Table 2). Indeed, risk of infection was 3-fold higher (OR= 3.134,  $p < 0.0001$ ) in older children and 2.5-fold higher (OR= 2.616,  $p < 0.0001$ ) in adults than in young children, likely indicating the effect of SMC in this age group.

Residents of villages K and P were more at risk of infection than those of village N (OR= 1.848,  $p = 0.0236$  and OR= 3.499,  $p < 0.0001$  for villages K and P, respectively). Individuals with

234 different degree of anaemia had higher odds of being infected by *P. falciparum* compared to non-  
 235 anaemic individuals (Table 2). Fever at inclusion was strongly associated with infection (OR= **4.374** ,  
 236  $p= 0.007$ ).

237 As malaria prevalence varied substantially between and within villages, the analysis  
 238 investigated whether some households were hotspots of malaria transmission. Analyses focused on  
 239 villages J and K, as data are available over a 2-year study period. By utilizing the Bernoulli spatial  
 240 scan statistic in Satscan algorithm, two clusters in village J with a high prevalence of *P. falciparum*  
 241 infections were identified (Supplementary Table 2). Similarly, in village K, three clusters of high  
 242 *Plasmodium falciparum* infections at two different times (November and December 2016) were  
 243 identified ( $P < 0.05$ ) (Supplementary Table 2). However, when *P. falciparum* prevalence at the  
 244 household level in the two villages was plotted over time, no evidence of clustering of infection over  
 245 time within the same households or recurrent infections among neighbouring households was found  
 246 (Supplementary Figure 4). This suggests that transmission is stochastic, with no evidence of sustained  
 247 malaria hotspots in these villages.

248 **Table 2: Assessment of associated risk factors of *P. falciparum* infection**

249

| Factors                           | Description (n)       | % infections (n)  | OR [95% CI]                | P value            |
|-----------------------------------|-----------------------|-------------------|----------------------------|--------------------|
| Sex                               | F (1513)              | 11.4 (172)        | Ref                        |                    |
|                                   | <b>M (1162)</b>       | <b>13.9 (162)</b> | <b>1.336 [1.031-1.731]</b> | <b>0.0280</b>      |
| Age groups (Years)                | < 5 (474)             | 6.33 (30)         | Ref                        |                    |
|                                   | <b>5-14 (1078)</b>    | <b>13.8 (149)</b> | <b>3.134 [2.041-4.813]</b> | <b>&lt; 0.0001</b> |
|                                   | <b>≥ 15 (1123)</b>    | <b>13.7 (154)</b> | <b>2.616 [1.697-4.032]</b> | <b>&lt; 0.0001</b> |
| Village of residence              | J (542)               | 10.3 (56)         | 1.616 [0.895-2.916]        | 0.1110             |
|                                   | <b>K (1235)</b>       | <b>11.9 (147)</b> | <b>1.848 [1.085-3.146]</b> | <b>0.0236</b>      |
|                                   | N (305)               | 7.9 (24)          | Ref                        |                    |
|                                   | <b>P (599)</b>        | <b>17.7 (106)</b> | <b>3.499 [2.026-6.043]</b> | <b>&lt; 0.0001</b> |
| History of fever in the past week | Yes (131)             | 14.5 (19)         | 1.021 [0.590-1.767]        | 0.9382             |
|                                   | No (2306)             | 12.49 (288)       | Ref                        |                    |
| Anaemia*                          | Non-anaemic (1390)    | 10.6 (147)        | Ref                        |                    |
|                                   | <b>Mild (550)</b>     | <b>13.6 (75)</b>  | <b>1.577 [1.155-2.155]</b> | <b>0.0042</b>      |
|                                   | <b>Moderate (493)</b> | <b>16.2 (80)</b>  | <b>1.759 [1.294-2.392]</b> | <b>0.0003</b>      |
|                                   | <b>Severe (37)</b>    | <b>29.7 (11)</b>  | <b>3.942 [1.818-8.548]</b> | <b>0.0005</b>      |
| Fever at inclusion                | <b>Yes (19)</b>       | <b>31.6 (6)</b>   | <b>4.374 [1.496-12.78]</b> | <b>0.0070</b>      |
|                                   | No (2446)             | 12.6 (307)        | Ref                        |                    |

250 Only individuals from the second cohort (N= 2681) were included in this multivariate mixed-effects logistic regression  
 251 model because complete epidemiological information were only available for these individuals. In this model all fixed-  
 252 effect variables were adjusted for clustering at different months of data collection (time of sampling), at the household  
 253 level, and at the individual level, with the individual level nested within the household level. \*Anaemia determined by  
 254 age and sex according to the OMS 2011 report (OMS, 2011). Significant estimates are bolded. OR: odds ratio. CI:  
 255 Confident interval. Ref: reference.

256

257 **Asymptomatic parasitaemia at the end of dry season is associated with infection and clinical**  
258 **malaria during the following transmission season**

259 The individual risk of being infected during the transmission season according to the infection  
260 status at the beginning of the transmission season was investigated (Figure 4 and Table 3). In July  
261 2016, 67 individuals were asymptomatic carriers and treated with artesunate-lumefantrine  
262 antimalarials; 68.7% (46) of them were re-infected during the transmission season. Among the 613  
263 individuals non-infected in July 2016, 28.5% (175) of them became infected during the same period  
264 (HR= 3.338,  $p < 0.0001$ ) (Figure 4 and Table 3). The association between infection status and risk of  
265 infection during the transmission season remains significant after adjustment for age and village (HR=  
266 3.0,  $p < 0.0001$ ) (Table 3). Multivariate analysis shows that age and village of residence were  
267 independently associated with risk of infection (HR= 2.767,  $p < 0.0001$  for age 5-14 years, HR= 3.063,  
268  $p < 0.0001$  for age  $\geq 15$  years and HR= 2.375,  $p = 0.0012$  for village P).

269 Individuals with a malaria parasite infection in July 2016 had a 2-fold higher risk of  
270 experiencing a clinical malaria episode than those without infection (HR= 1.825,  $p = 0.0086$ ); this  
271 effect persisted after adjusting for age, village and anaemia (HR= 1.561,  $p = 0.057$ ) (Table 4).  
272 Additionally, age and villages were also independent predicting factors for clinical malaria during the  
273 transmission season (HR= 3.404,  $p = 0.0003$ , HR= 3.951,  $p < 0.0001$  and HR= 2.717,  $p = 0.0054$  for  
274 age 5-14 years, age  $\geq 15$  years and village P, respectively). Together, these data indicate that  
275 asymptomatic carriage of parasites during the dry season is associated with an increased risk of  
276 infection and clinical malaria during the following transmission season.

277

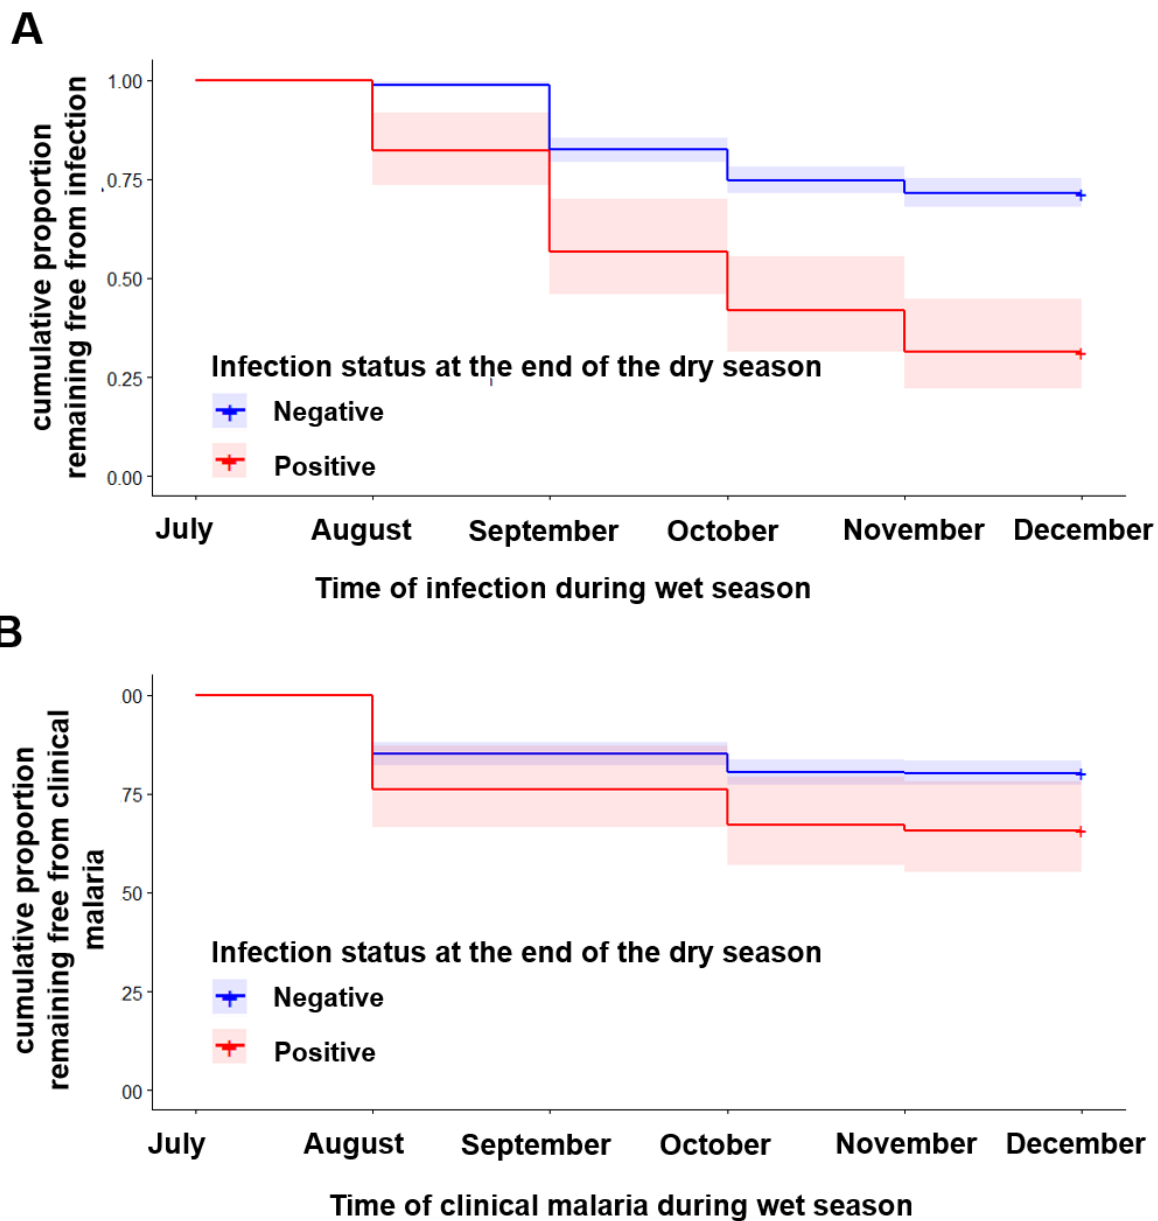

278

279 **Figure 4. Asymptomatic *P. falciparum* carriage at the end of dry season and during the**  
 280 **subsequent transmission season. Being carrier in the dry season increases the risk of both *P.***  
 281 ***falciparum* infection (A) and malaria symptoms in the following transmission season (B). Time to**  
 282 **infection and/or onset of clinical malaria were grouped into a one-month interval.**

283

284 **Table 3: Predicted hazard of *P. falciparum* infection during the malaria transmission season**

| Factors                                         | Description (n) | % infections (n) | Univariate analysis |         | Multivariate analysis |         |
|-------------------------------------------------|-----------------|------------------|---------------------|---------|-----------------------|---------|
|                                                 |                 |                  | HR [95% CI]         | P value | HR [95% CI]           | P value |
| Asymptomatic infection at the end of dry season | Yes (67)        | 68.7 (46)        | 3.388 [2.433-4.718] | <0.0001 | 3.0 [2.149-4.190]     | <0.0001 |
|                                                 | No (613)        | 28.5 (175)       | Ref                 |         | Ref                   |         |
| Sex                                             | F (383)         | 31.3 (120)       | 1.155 [0.884-1.509] | 0.29    |                       |         |
|                                                 | M (295)         | 34.2 (101)       | Ref                 |         |                       |         |
|                                                 | < 5 (129)       | 15.5 (20)        | Ref                 |         | Ref                   |         |

|                                          |                   |                   |                            |                   |                            |                   |
|------------------------------------------|-------------------|-------------------|----------------------------|-------------------|----------------------------|-------------------|
| <b>Age groups (Years)</b>                | <b>5-14 (296)</b> | <b>33.8 (100)</b> | <b>2.621 [1.617-4.245]</b> | <b>&lt;0.0001</b> | <b>2.767 [1.704-4.493]</b> | <b>&lt;0.0001</b> |
|                                          | <b>≥ 15 (253)</b> | <b>39.9 (101)</b> | <b>2.917 [1.801-4.724]</b> | <b>&lt;0.0001</b> | <b>3.063 [1.888-4.970]</b> | <b>&lt;0.0001</b> |
| <b>Village of residence</b>              | J (107)           | 30.8 (33)         | 1.332 [0.748-2.373]        | 0.33              | 1.571 [0.870-2.837]        | 0.13              |
|                                          | K (304)           | 25.7 (78)         | 1.05 [0.626-1.760]         | 0.85              | 1.084 [0.637-1.845]        | 0.76              |
|                                          | N (73)            | 24.7 (18)         | Ref                        |                   |                            |                   |
|                                          | <b>P (196)</b>    | <b>46.9 (92)</b>  | <b>2.255 [1.355-3.751]</b> | <b>0.0017</b>     | <b>2.375 [1.407-4.007]</b> | <b>0.0012</b>     |
| <b>History of fever in the past week</b> | Yes (21)          | 38.1 (8)          | 1.253 [0.608-2.582]        | 0.54              |                            |                   |
|                                          | No (647)          | 31.7 (205)        | Ref                        |                   |                            |                   |
| <b>Anaemia*</b>                          | No (370)          | 32.7 (121)        | Ref                        |                   |                            |                   |
|                                          | Mild (155)        | 29.0 (45)         | 0.861 [0.610-1.217]        | 0.40              |                            |                   |
|                                          | Moderate (135)    | 33.3 (45)         | 1.051 [0.743-1.485]        | 0.78              |                            |                   |
|                                          | Severe (10)       | 40.0 (4)          | 1.549 [0.567-4.235]        | 0.39              |                            |                   |
| <b>Fever at inclusion</b>                | Yes (7)           | 14.3 (1)          | 0.320 [0.044-2.310]        | 0.326             |                            |                   |
|                                          | No (663)          | 32.3 (214)        | Ref                        |                   |                            |                   |

285 In this analysis only individuals with known infection status during the follow-up period were included (data on active or  
 286 passive diagnosis of infection at least once during the follow-up period). \* Anaemia determined by age and sex according  
 287 to the OMS 2011 report (OMS, 2011). Significant estimates are bolded. HR.: Hazard ratio. CI: Confident interval. Ref:  
 288 reference. Only factors associated with infection in the univariate analysis ( $p < 0.05$ ) were included in the multivariate  
 289 analysis.

290

291 **Table 4: Predicted hazard of clinical malaria during the malaria transmission season**

| <b>Factors</b>                                         | Description (n)   | <b>Univariate analysis</b>   |                            |               | <b>Multivariate analysis</b> |                    |
|--------------------------------------------------------|-------------------|------------------------------|----------------------------|---------------|------------------------------|--------------------|
|                                                        |                   | % symptomatic infections (n) | HR [95% CI]                | P value       | HR [95% CI]                  | P value            |
| <b>Asymptomatic infection at the end of dry season</b> | <b>Yes (67)</b>   | <b>34.3 (23)</b>             | <b>1.826 [1.165-2.861]</b> | <b>0.0086</b> | <b>1.561[0.988-2.467]</b>    | <b>0.057</b>       |
|                                                        | <b>No (241)</b>   | <b>19.7 (121)</b>            | <b>Ref</b>                 |               | <b>Ref</b>                   |                    |
| <b>Sex</b>                                             | F (383)           | 19.6 (73)                    | 1.306 [0.941-1.815]        | 0.11          |                              |                    |
|                                                        | M (295)           | 24.1 (71)                    | Ref                        |               |                              |                    |
| <b>Age groups (Years)</b>                              | < 5 (129)         | 7.7 (10)                     | Ref                        |               | Ref                          |                    |
|                                                        | <b>5-14 (296)</b> | <b>23.6 (70)</b>             | <b>3.404 [1.751-6.617]</b> | <b>0.0003</b> | <b>3.404 [1.746-6.638]</b>   | <b>0.0003</b>      |
|                                                        | <b>≥ 15 (253)</b> | <b>25.5 (64)</b>             | <b>3.656 [1.751-7.131]</b> | <b>0.0001</b> | <b>3.951 [2.024 -7.714]</b>  | <b>&lt; 0.0001</b> |
| <b>Village of residence</b>                            | J (107)           | 23.4 (25)                    | 2.024 [0.945-4.337]        | 0.07          | 2.115 [0.980-4.562]          | 0.056              |
|                                                        | K (304)           | 16.4 (20)                    | 1.347 [0.663-2.740]        | 0.41          | 1.299[0.636-2.651]           | 0.47               |
|                                                        | N (73)            | 12.3 (9)                     | Ref                        |               | Ref                          |                    |
|                                                        | <b>P (196)</b>    | <b>30.6 (60)</b>             | <b>2.721 [1.350-5.484]</b> | <b>0.0051</b> | 1.218[0.966-1.536]           | 0.095              |
| <b>History of fever in the past week</b>               | Yes (21)          | 19.0 (4)                     | 0.889 [0.325-2.435]        | 0.82          | <b>2.717 [1.344-5.494]</b>   | <b>0.0054</b>      |
|                                                        | No (647)          | 27.7 (134)                   | Ref                        |               |                              |                    |
| <b>Anaemia*</b>                                        | <b>No (370)</b>   | <b>23.2 (86)</b>             | <b>1.672 [1.044-2.677]</b> | <b>0.032</b>  | <b>1.744[1.187-2.797]</b>    | <b>0.0231</b>      |
|                                                        | Mild (155)        | 14.2 (22)                    | Ref                        |               | Ref                          |                    |
|                                                        | Moderate (135)    | 22.2 (30)                    | 1.619 [0.932-2.813]        | 0.087         | 1.620[0.933-2.812]           | 0.087              |
|                                                        | Severe (10)       | 20.0 (2)                     | 1.459 [0.341-6.231]        | 0.61          | 1.335[0.312-5.723]           | 0.07               |
| <b>Fever at inclusion</b>                              | Yes (7)           | 14.3 (1)                     | 0.535 [0.074-3.872]        | 0.676         |                              |                    |
|                                                        | No (663)          | 21.0 (139)                   | Ref                        |               |                              |                    |

292 In this analysis only individuals with known infection status during the follow-up period were included (data on active or  
 293 passive diagnosis of infection at least once during the follow-up period). \* Anaemia determined by age and sex according  
 294 to the OMS 2011 report (OMS, 2011). Significant estimates are bolded. HR.: Hazard ratio. CI: Confident interval. Ref:

295 reference. Only factors associated with symptomatic infections in the univariate analysis ( $p < 0.05$ ) were included in the  
296 multivariate analysis.

## 297 Discussion

298 In The Gambia, there is a need to evaluate and improve existing community-based  
299 interventions through ongoing epidemiological surveillance and the identification of risk factor for  
300 parasite carriage. The dynamics and the factors associated with *P. falciparum* infections, and the link  
301 between asymptomatic carriage before the transmission season and risk of infection and clinical  
302 malaria were investigated over 2 years.

303 Consistent with previous studies in The Gambia [6,13,20], the prevalence of infection was  
304 lower in children under 5 years of age than in older children and adults, possibly due to the seasonal  
305 malaria chemoprophylaxis programme (monthly antimalarial treatment during the transmission  
306 season) [28,29]. The higher prevalence of infection and high parasite densities in older children than  
307 in adults may be the result of acquired immunity that makes adults better protected and able to better  
308 control parasite growth when infected [30]. Furthermore, in line with acquired immunity with age,  
309 when infected during the transmission season, children under 5 years old had a higher parasite density  
310 compared to adults. We observed that individuals with different degrees of anaemia were more likely  
311 to be infected with *P. falciparum* than non-anaemic individuals. This observation appears to be the  
312 consequence of *Plasmodium* infection rather than the cause of infection, given that malaria is known  
313 to be the main cause of anaemia in endemic areas [31,32].

314 There was significant variability in malaria prevalence between villages. These findings demonstrate  
315 the heterogeneity of malaria transmission in the eastern Gambia, even among neighbouring villages.  
316 Similarly, in a previous study [20], significant variation in malaria prevalence in this region was  
317 observed, ranging from 21.17% to 49.13%. This discrepancy was attributed not only to the observed  
318 higher insecticide resistance [33,34] but also to differences in vector composition. Indeed, *An.*  
319 *gambiae s.s.* is more common in villages away from The Gambia river, while *An. arabiensis* and *An.*  
320 *coluzzii* are more widespread near the river [34].

321 Due to the variation in malaria prevalence among neighbouring villages, there is a hypothesis  
322 regarding the presence of sustained malaria transmission hotspots within the villages, where certain  
323 households, based on the characteristics of the individuals and their environment, could sustain  
324 transmission in the area. Although some households exhibited significantly high malaria prevalence  
325 within villages, these households were not consistently the same, with no evidence of hotspot  
326 households spreading malaria, suggesting that the transmission pattern follows a stochastic pattern in  
327 the area [35]. Therefore, a targeted malaria prevention approach focusing households with highest  
328 prevalence is unlikely to yield a lasting effect in this area. However, treating all malaria cases  
329 identified in cohort 2 may have altered spatio-temporal patterns-

330 Asymptomatic carriage of *P. falciparum* at the end of the dry season was associated with both  
331 an increased risk of infection and clinical malaria during the following transmission season.  
332 Consistent with this, studies in seasonal malaria transmission areas where the dry season lasts for ~  
333 6-8 months showed that asymptomatic *P. falciparum* infections at the end of dry season are associated  
334 with the increase risk of the infection [16,36] or clinical malaria during the following transmission  
335 season [14–17,37]. The main hypothesis is that although individuals were treated at the end of the  
336 dry season, they continued to reside in the same environment where they were initially infected, with  
337 potentially higher risk of being re-infected. Nevertheless, individuals testing negative at the end of  
338 the dry season and being able to control new infections without developing symptoms suggests a  
339 fairly effective immunity and the ability to suppress parasites below detection levels. However, our  
340 data differs from other reports which show that asymptomatic *P. falciparum* infections at the end of



341 the dry season were associated with a reduced risk of clinical malaria in the following transmission  
342 season [11–13,36,38]. Chronic infections and the maintenance of immunity could protect against high  
343 parasitaemia and clinical malaria [39,40]. The discrepancy between asymptomatic infections being a  
344 protection or a risk for reinfection/clinical malaria could be explained by the large range of malaria  
345 transmission intensity between the cited studies, as well as local environmental conditions. For  
346 example, a recent study conducted in The Gambia revealed that in the semi-urban villages dry season  
347 carriage was associated with an increased risk of clinical malaria during the following transmission  
348 season, whereas such risk was lower in rural villages [6]. Finally, a pooled analysis also demonstrated  
349 the importance of transmission intensity with risks of subsequent clinical malaria, as well as host age  
350 and polyclonality of infection [19] although this meta-analysis encompassed studies that evaluated  
351 clinical infections within the same asymptomatic infection.

352 In conclusion, this 2-years study identified village of residence, anaemia, and fever at  
353 enrolment as independent factors associated with *P. falciparum* infections in the eastern Gambia. *P.*  
354 *falciparum* transmission pattern seems stochastic. The data further validate the notion that  
355 asymptomatic parasitaemia carriage at the end of dry season correlates with a higher risk of infection  
356 and clinical malaria during the following transmission season. Therefore, targeting asymptomatic  
357 infections during the dry season may reduce the risk of clinical malaria in the following transmission  
358 season.

## 359 **Financial support**

360 This work was funded by grants from the Netherlands Organization for Scientific Research (Vidi  
361 fellowship NWO 016.158.306) and the Bill & Melinda Gates Foundation (INDIE OPP1173572), the  
362 joint MRC/LSHTM fellowship, CNRS, the French National Research Agency (18-CE15-0009-01).  
363 The "SPF- Post doc en France" programme of the "Fondation pour la Recherche Médicale" funded  
364 the author "Balotin Fogang" (SPF202209015889).

## 365 **Competing interests**

366 No conflicts of interest were reported by the authors.

## 367 **Acknowledgements**

368 Our thanks go to Julia Mwesigwa and all fieldworkers involved in the study. We would like to thank  
369 the inhabitants of the four villages (Madina Samako, Njayel, Sendebu, and Karanbada) in eastern part  
370 of The Gambia who took part in this study.  
371

## 372 **References**

- 373 1. WHO. World Malaria Report 2022. Geneva, World Health Organization; 2022.
- 374 2. WHO. World Malaria Report 2021. Geneva, World Health Organization; 2021.
- 375 3. Andolina C, Rek JC, Briggs J, Okoth J, Musiime A, Ramjith J, et al. Sources of persistent malaria transmission in a  
376 setting with effective malaria control in eastern Uganda: a longitudinal, observational cohort study. *Lancet Infect Dis.*  
377 2021;21:1568–78.
- 378 4. Ceesay SJ, Casals-Pascual C, Erskine J, Anya SE, Duah NO, Fulford AJ, et al. Changes in malaria indices between  
379 1999 and 2007 in The Gambia: a retrospective analysis. *The Lancet.* 2008;372:1545–54.
- 380 5. Ceesay SJ, Casals-Pascual C, Nwakanma DC, Walther M, Gomez-Escobar N, Fulford AJC, et al. Continued Decline  
381 of Malaria in The Gambia with Implications for Elimination. *PLoS ONE.* 2010;5:e12242.
- 382 6. Ahmad A, Mohammed NI, Joof F, Affara M, Jawara M, Abubakar I, et al. Asymptomatic *Plasmodium falciparum*  
383 carriage and clinical disease: a 5-year community-based longitudinal study in The Gambia. *Malar J.* 2023;22:82.
- 384 7. Mooney JP, DonVito SM, Jahateh M, Bittaye H, Bottomley C, D’Alessandro U, et al. Dry season prevalence of  
385 *Plasmodium falciparum* in asymptomatic gambian children, with a comparative evaluation of diagnostic methods.  
386 *Malar J.* 2022;21:171.
- 387 8. Mwesigwa J, Achan J, Di Tanna GL, Affara M, Jawara M, Worwui A, et al. Residual malaria transmission dynamics  
388 varies across The Gambia despite high coverage of control interventions. *PLoS ONE.* 2017;12:e0187059.
- 389 9. Collins KA, Ceesay S, Drammeh S, Jaiteh FK, Guery MA, Lanke K, et al. A Cohort Study on the Duration of  
390 *Plasmodium falciparum* Infections During the Dry Season in The Gambia. *J Infect Dis.* 2022;226:128–37.
- 391 10. Buchwald AG, Sixpence A, Chimanya M, Damson M, Sorkin JD, Wilson ML, et al. Clinical Implications of  
392 Asymptomatic *Plasmodium falciparum* Infections in Malawi. *Clin Infect Dis Off Publ Infect Dis Soc Am.*  
393 2019;68:106–12.

- 394 11. Males S, Gaye O, Garcia A. Long-term asymptomatic carriage of *Plasmodium falciparum* protects from malaria  
395 attacks: a prospective study among Senegalese children. *Clin Infect Dis Off Publ Infect Dis Soc Am*. 2008;46:516–22.
- 396 12. Portugal S, Tran TM, Ongoiba A, Bathily A, Li S, Doumbo S, et al. Treatment of Chronic Asymptomatic  
397 *Plasmodium falciparum* Infection Does Not Increase the Risk of Clinical Malaria Upon Reinfection. *Clin Infect Dis*.  
398 2017;64:645–53.
- 399 13. Sondén K, Doumbo S, Hammar U, Vafa Homann M, Ongoiba A, Traoré B, et al. Asymptomatic Multiclonal  
400 *Plasmodium falciparum* Infections Carried Through the Dry Season Predict Protection Against Subsequent Clinical  
401 Malaria. *J Infect Dis*. 2015;212:608–16.
- 402 14. Berezcky S, Liljander A, Rooth I, Faraja L, Granath F, Montgomery SM, et al. Multiclonal asymptomatic  
403 *Plasmodium falciparum* infections predict a reduced risk of malaria disease in a Tanzanian population. *Microbes Infect*.  
404 2007;9:103–10.
- 405 15. Le Port A, Cot M, Etard J-F, Gaye O, Migot-Nabias F, Garcia A. Relation between *Plasmodium falciparum*  
406 asymptomatic infection and malaria attacks in a cohort of Senegalese children. *Malar J*. 2008;7:193.
- 407 16. Liljander A, Bejon P, Mwacharo J, Kai O, Ogada E, Peshu N, et al. Clearance of asymptomatic *P. falciparum*  
408 Infections Interacts with the number of clones to predict the risk of subsequent malaria in Kenyan children. *PloS One*.  
409 2011;6:e16940.
- 410 17. Sumner KM, Mangeni JN, Obala AA, Freedman E, Abel L, Meshnick SR, et al. Impact of asymptomatic  
411 *Plasmodium falciparum* infection on the risk of subsequent symptomatic malaria in a longitudinal cohort in Kenya.  
412 Ferreira MU, Soldati-Favre D, Ferreira MU, Koepfli C, editors. *eLife*. 2021;10:e68812.
- 413 18. Wamae K, Wambua J, Nyangweso G, Mwambingu G, Osier F, Ndung'u F, et al. Transmission and Age Impact the  
414 Risk of Developing Febrile Malaria in Children with Asymptomatic *Plasmodium falciparum* Parasitemia. *J Infect Dis*.  
415 2019;219:936–44.
- 416 19. Eldh M, Hammar U, Arnot D, Beck H-P, Garcia A, Liljander A, et al. Multiplicity of Asymptomatic *Plasmodium*  
417 *falciparum* Infections and Risk of Clinical Malaria: A Systematic Review and Pooled Analysis of Individual Participant  
418 Data. *J Infect Dis*. 2020;221:775–85.
- 419 20. Mwesigwa J, Okebe J, Affara M, Di Tanna GL, Nwakanma D, Janha O, et al. On-going malaria transmission in The  
420 Gambia despite high coverage of control interventions: a nationwide cross-sectional survey. *Malar J*. 2015;14:314.
- 421 21. Venkatesan M, Amaratunga C, Campino S, Auburn S, Koch O, Lim P, et al. Using CF11 cellulose columns to  
422 inexpensively and effectively remove human DNA from *Plasmodium falciparum*-infected whole blood samples. *Malar*  
423 *J*. 2012;11:41.
- 424 22. Snounou G, Pinheiro L, Gonçalves A, Fonseca L, Dias F, Brown KN, et al. The importance of sensitive detection of  
425 malaria parasites in the human and insect hosts in epidemiological studies, as shown by the analysis of field samples  
426 from Guinea Bissau. *Trans R Soc Trop Med Hyg*. 1993;87:649–53.
- 427 23. Plowe CV, Djimde A, Bouare M, Doumbo O, Wellems TE. Pyrimethamine and proguanil resistance-conferring  
428 mutations in *Plasmodium falciparum* dihydrofolate reductase: polymerase chain reaction methods for surveillance in  
429 Africa. *Am J Trop Med Hyg*. 1995;52:565–8.
- 430 24. Hofmann N, Mwingira F, Shekalaghe S, Robinson LJ, Mueller I, Felger I. Ultra-sensitive detection of *Plasmodium*  
431 *falciparum* by amplification of multi-copy subtelomeric targets. *PLoS Med*. 2015;12:e1001788.
- 432 25. R Core Team. R: A Language and Environment for Statistical Computing. R Foundation for Statistical Computing;  
433 2023.

- 434 26. OMS. Organisation Mondiale de la Santé 2011. Concentrations en hémoglobine permettant de diagnostiquer  
435 l'anémie et d'en évaluer la sévérité. Genève, Organisation Mondiale de la Santé; 2011.
- 436 27. Kulldorff M. Bernoulli, Discrete Poisson and Continuous Poisson Models: Kulldorff M. A spatial scan statistic.  
437 *Commun Stat Theory Methods*. 1997;26:1481–96.
- 438 28. Ahmad A, Prom A, Bradley J, Ndiath M, Etoketim B, Bah M, et al. Gametocyte carriage after seasonal malaria  
439 chemoprevention in *Plasmodium falciparum* infected asymptomatic children. *Malar J*. 2021;20:169.
- 440 29. WHO. World Malaria Report 2017. Geneva, World Health Organization; 2017.
- 441 30. Filipe JAN, Riley EM, Drakeley CJ, Sutherland CJ, Ghani AC. Determination of the Processes Driving the  
442 Acquisition of Immunity to Malaria Using a Mathematical Transmission Model. *PLOS Comput Biol*. 2007;3:e255.
- 443 31. Korenromp EL, Armstrong-Schellenberg JRM, Williams BG, Nahlen BL, Snow RW. Impact of malaria control on  
444 childhood anaemia in Africa -- a quantitative review. *Trop Med Int Health TM IH*. 2004;9:1050–65.
- 445 32. White NJ. Anaemia and malaria. *Malar J* [Internet]. 2018 [cited 2019 Aug 31];17. Available from:  
446 <https://www.ncbi.nlm.nih.gov/pmc/articles/PMC6194647/>
- 447 33. Tangena J-AA, Adiamoh M, D'Alessandro U, Jarju L, Jawara M, Jeffries D, et al. Alternative Treatments for Indoor  
448 Residual Spraying for Malaria Control in a Village with Pyrethroid- and DDT-Resistant Vectors in The Gambia. *PLOS*  
449 *ONE*. 2013;8:e74351.
- 450 34. Wilson AL, Pinder M, Bradley J, Donnelly MJ, Hamid-Adiamoh M, Jarju LBS, et al. Emergence of knock-down  
451 resistance in the *Anopheles gambiae* complex in the Upper River Region, The Gambia, and its relationship with malaria  
452 infection in children. *Malar J*. 2018;17:205.
- 453 35. Stresman GH, Mwesigwa J, Achan J, Giorgi E, Worwui A, Jawara M, et al. Do hotspots fuel malaria transmission: a  
454 village-scale spatio-temporal analysis of a 2-year cohort study in The Gambia. *BMC Med*. 2018;16:160.
- 455 36. Stadler E, Cromer D, Ogunlade S, Ongoiba A, Doumbo S, Kayentao K, et al. Evidence for exposure dependent  
456 carriage of malaria parasites across the dry season: modelling analysis of longitudinal data. *Malar J*. 2023;22:42.
- 457 37. Färnert A, Williams TN, Mwangi TW, Ehlin A, Fegan G, Macharia A, et al. Transmission-Dependent Tolerance to  
458 Multiclonal *Plasmodium falciparum* Infection. *J Infect Dis*. 2009;200:1166–75.
- 459 38. Adu B, Issahaque Q, Sarkodie-Addo T, Kumordjie S, Kyei-Baafour E, Sinclair CK, et al. Microscopic and  
460 Submicroscopic Asymptomatic *Plasmodium falciparum* Infections in Ghanaian Children and Protection against Febrile  
461 Malaria. *Infect Immun*. 2020;88:10.1128/iai.00125-20.
- 462 39. Ademolue TW, Awandare GA. Evaluating antidisease immunity to malaria and implications for vaccine design.  
463 *Immunology*. 2018;153:423–34.
- 464 40. Kimenyi KM, Wamae K, Ochola-Oyier LI. Understanding *P. falciparum* Asymptomatic Infections: A Proposition  
465 for a Transcriptomic Approach. *Front Immunol*. 2019;10.

466

## 467 Supplementary Figures

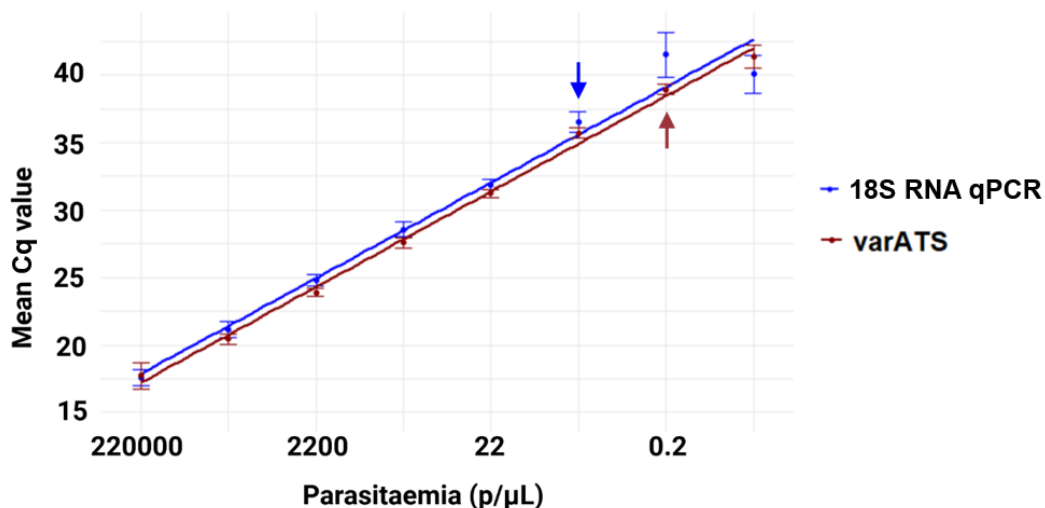

468

469

470

471

472

473

474

475

476

477

478

479

480

481

482

483

484

485

486

**Supplementary Figure 1. varATS and 18S RNA standard curves using 3D7 gDNA.** The scatter plot represents the mean Cq value of the amplification of 8 replicates of the 10-fold serial dilution of 220000 parasites/μL of ring stage lab adapted *P. falciparum* 3D7 strain. The arrows indicate the detection limits of the two tests (2.2 parasites/μL for 18S RNA qPCR and 0.2 for varATS). Data were generated with the following method: Ring stage laboratory-adapted *P. falciparum* strain 3D7 was used to determine analytical sensitivity and parasitemia by 10-fold dilution of 220000 parasites/μL of parasitemia in 50% haematocrit from an uninfected blood donor [24]. Dilutions were prepared as a DBS and genomic DNA was extracted as described above. Each DNA sample was tested in duplicate (field isolates and 3D7 strain) and the quantification curve was made from the 3D7 standard dilution. Cut-off values for positivity for 18S rRNA qPCR and varATS were dilutions 6 (parasitaemia of 2.2 parasites/μL) and 7 (parasitaemia of 0.22 parasites/μL), respectively. Samples were defined as *P. falciparum* positive if the Ct value was less than or equal to the Ct of the cut-off. Samples that exhibited amplification for both duplicates and had a visually clear amplification curve were considered positive if their CQ value exceeded dilution 7 but remained below the upper limit of the 95% confidence interval for this parasitemia. Parasite densities were determined using standard curves generated from 3D7 genomic DNA amplifications of all dilutions of each plate with known parasite density.

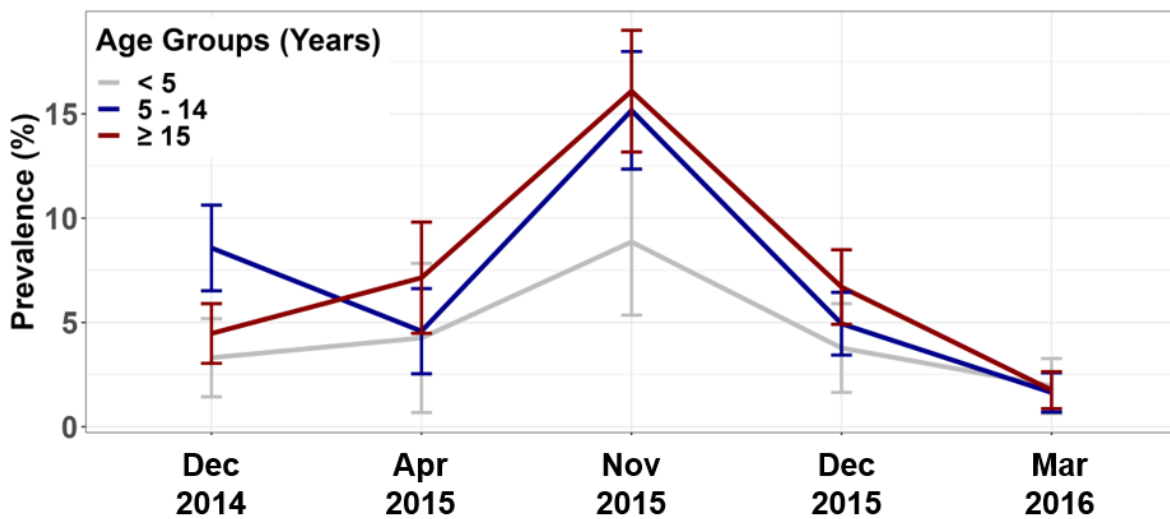

487

488

489 **Supplementary Figure 2: Trend analysis for *P. falciparum* infection prevalence by age groups**  
490 **in the first cohort, by nested PCR.** Error bars represent 95% confidence intervals for prevalence.

491

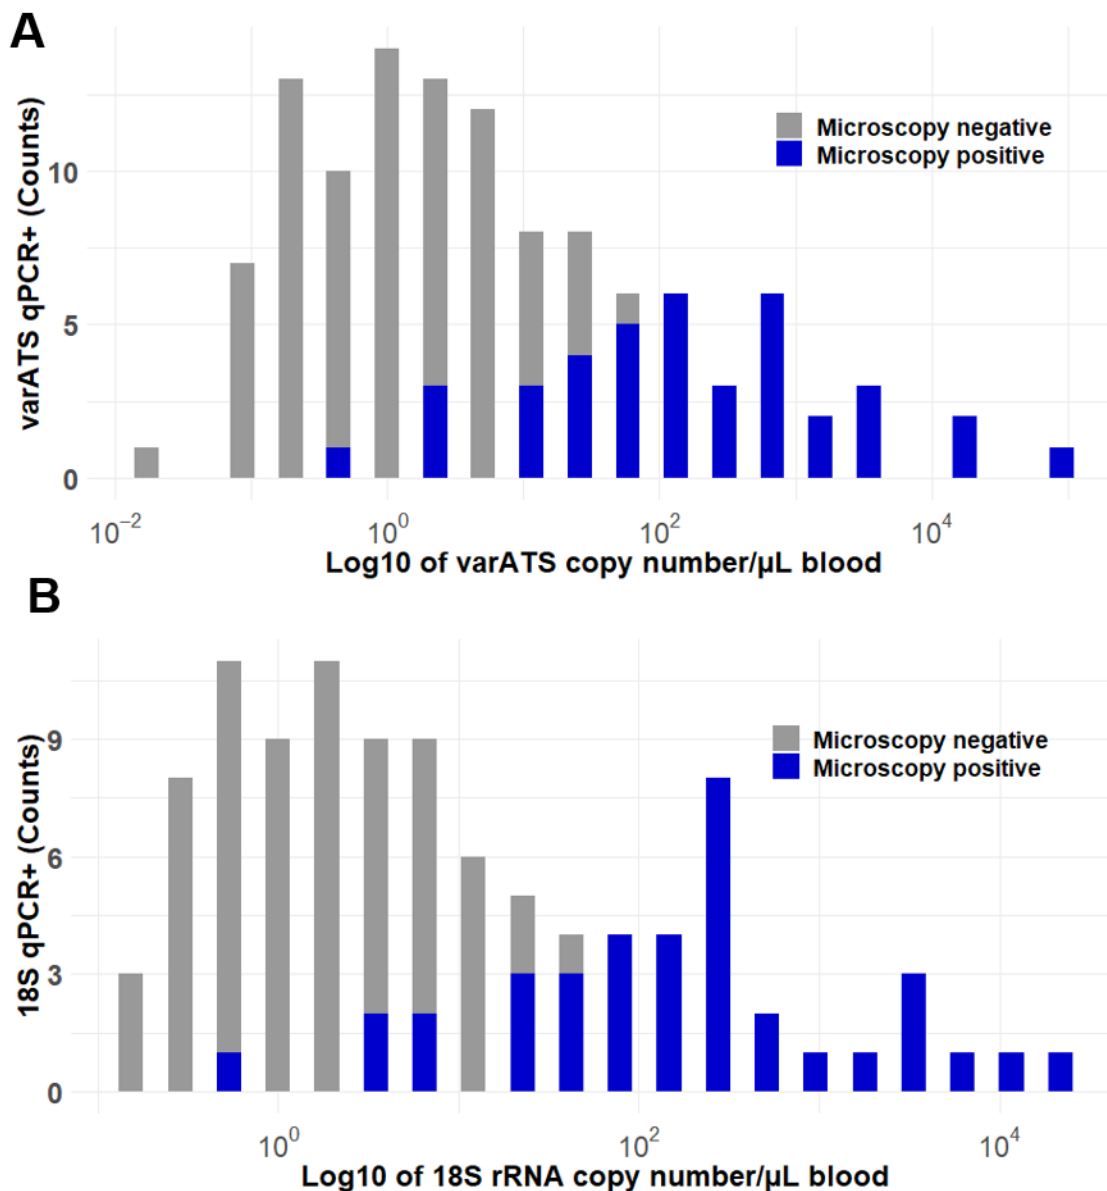

492

493

494

495

496

497

498

**Supplementary Figure 3. Parasites prevalence by microscopy according to parasite densities measured by varATS (A) and 18S rRNA qPCR (B) molecular tools.** Parasite densities quantified by varATS and 18S rRNA qPCR are presented (log10 scale with a bin size of 20) for both microscopy negative and microscopy positive.

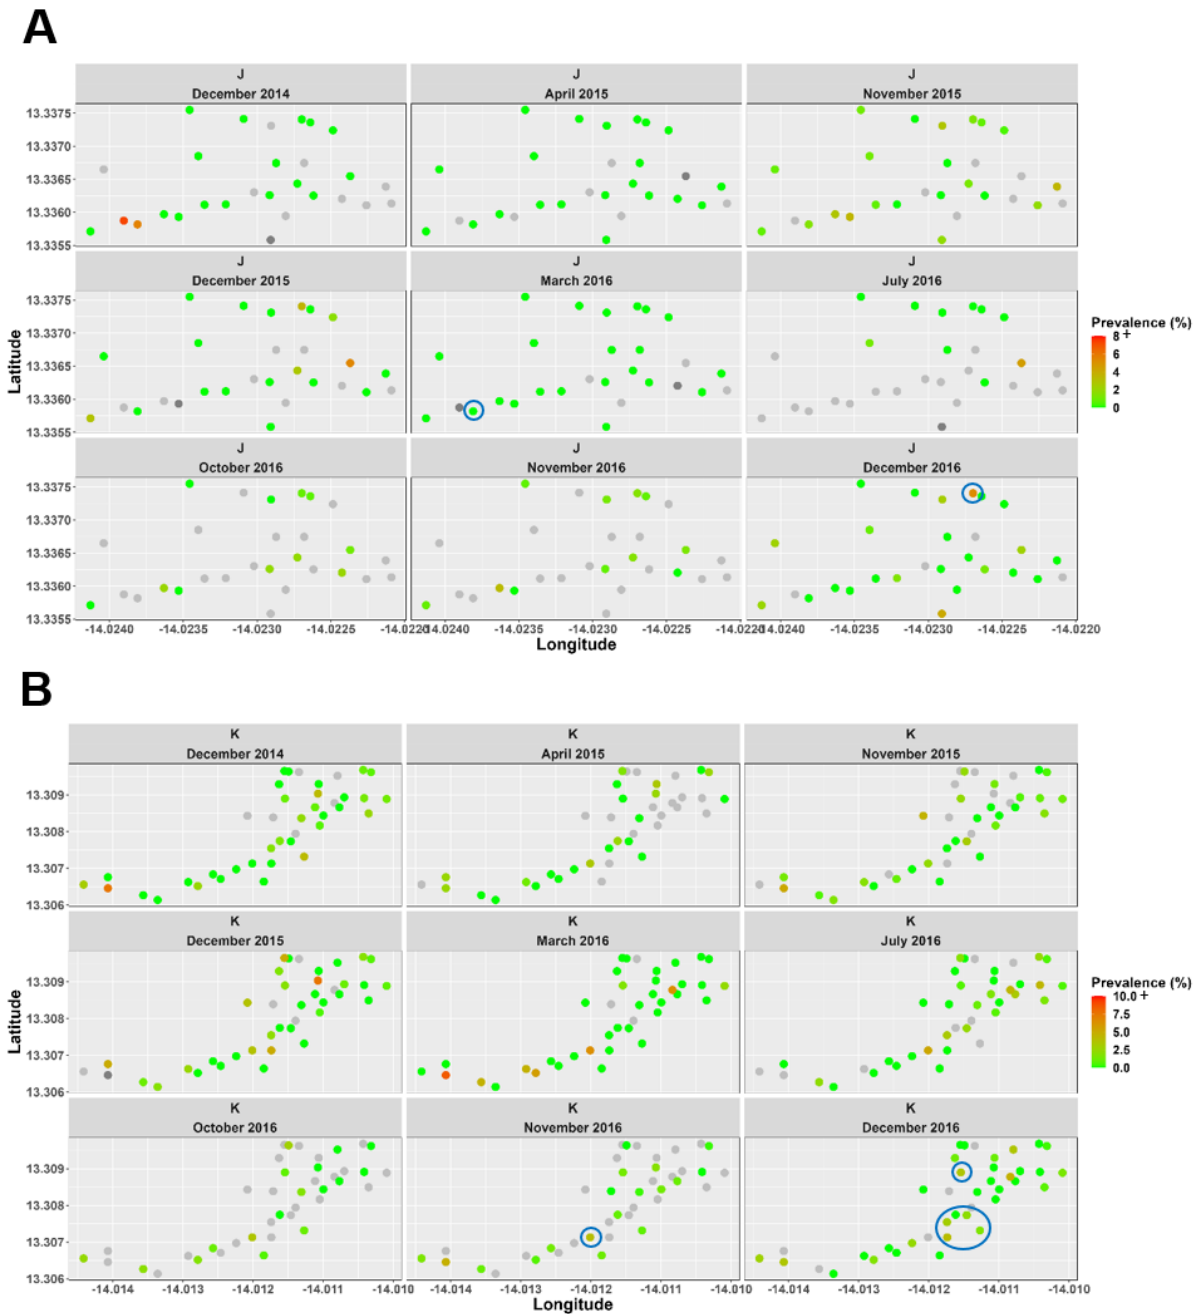

499

500

501

502

503

504

**Supplementary Figure 4. Spatio-temporal *P. falciparum* prevalence by household in villages J and K.** *P. falciparum* prevalence in each household was normalized to the prevalence of infections per month in each village and only households with at least three individuals were considered. Grey colour represents the household with no data. The blue circles represent the significant hotspots ( $p < 0.05$ ) determined using the Bernoulli spatial scan statistic in Satscan algorithm.



505 **Supplementary Tables**

506 **Supplementary Table 1. Hemoglobin levels (g/dl) and classification of anaemia (WHO, 2011)**

| Population                    | Anaemia status |           |          |        |
|-------------------------------|----------------|-----------|----------|--------|
|                               | No anaemia     | Mild      | Moderate | severe |
| Children 6 to 59 months       | ≥ 11.0         | 10.0-10.9 | 7.0-9.9  | < 7    |
| Children 6 to 11 years        | ≥ 11.5         | 11.0-11.4 | 8.0-10.9 | < 8    |
| Children 12 to 14 years       | ≥ 12.0         | 11.0-11.9 | 8.0-10.9 | < 8    |
| Non-pregnant women > 15 years | ≥ 12.0         | 11.0-11.9 | 8.0-10.9 | < 8    |
| Pregnant women > 15 years     | ≥ 11.0         | 10.0-10.9 | 7.0-9.9  | < 7    |
| Men > 15 years                | ≥ 13.0         | 11.0-12.9 | 8.0-10.9 | < 8    |

507

508 **Supplementary Table 2: Household-based assessment of *P. falciparum* infection clusters using**  
 509 **Bernoulli spatial scan statistic**

| Villages     | Sampling timepoint | Population | Infected | Prevalence of infections (%)       | Identified Clusters          | P-value |
|--------------|--------------------|------------|----------|------------------------------------|------------------------------|---------|
| K            | December 2014      | 373        | 30       | 8                                  | K014                         | 0.074   |
|              |                    |            |          |                                    | K001, K003                   | 0.126   |
|              |                    |            |          |                                    | K037                         | 0.638   |
|              |                    |            |          |                                    | K032                         | 0.999   |
|              | April 2015         | 141        | 14       | 9.9                                | K021, K022                   | 0.53    |
|              |                    |            |          |                                    | K001, K003, K002             | 0.85    |
|              |                    |            |          |                                    | K009                         | 0.95    |
|              | November 2015      | 247        | 36       | 14.6                               | K003                         | 0.231   |
|              |                    |            |          |                                    | K036                         | 0.366   |
|              |                    |            |          |                                    | K013, K014                   | 0.954   |
|              | December 2015      | 375        | 25       | 6.2                                | K002, K003                   | 0.107   |
|              |                    |            |          |                                    | K021                         | 0.478   |
|              |                    |            |          |                                    | K020                         | 0.794   |
|              |                    |            |          |                                    | K038, K009, K010             | 0.863   |
|              | March 2016         | 460        | 9        | 2                                  | K042, K005, K006, K041, K003 | 0.289   |
|              |                    |            |          |                                    | K001, K003                   | 0.255   |
| July 2016    | 366                | 28         | 7.7      | K028, K030, K027, K031             | 0.444                        |         |
|              |                    |            |          | K010, K011, K036, K038, K009       | 0.622                        |         |
|              |                    |            |          | K024                               | 0.995                        |         |
|              |                    |            |          | K001, K003, K005, K041, K007, K009 | 0.173                        |         |
| October 2016 | 226                | 16         | 7.1      | K019                               | 0.91                         |         |

|          |               |     |    |      |                                                |               |
|----------|---------------|-----|----|------|------------------------------------------------|---------------|
|          |               |     |    | K015 | 0.997                                          |               |
|          | November 2016 | 185 | 39 | 21.1 | <b>K009</b>                                    | <b>0.031</b>  |
|          |               |     |    |      | K003                                           | 0.065         |
|          |               |     |    |      | K017, K021                                     | 0.971         |
|          | December 2016 | 449 | 64 | 14.2 | <b>K017</b>                                    | <b>0.0025</b> |
|          |               |     |    |      | <b>K037, K036, K038, K010</b>                  | <b>0.0036</b> |
|          |               |     |    |      | K001, K003                                     | 0.334         |
|          |               |     |    |      | K023                                           | 0.712         |
|          |               |     |    |      | K030                                           | 0.776         |
|          |               |     |    |      | K026                                           | 0.985         |
|          |               |     |    |      | K008                                           | 0.999         |
|          | December 2014 | 201 | 3  | 1.5  | J014, J016                                     | 0.382         |
|          | April 2015    | 147 | 1  | 0.7  | NC                                             |               |
|          | November 2015 | 184 | 26 | 14.1 | J013, J017                                     | 0.342         |
|          |               |     |    |      | J003, J006, J004                               | 0.664         |
|          |               |     |    |      | J023                                           | 0.938         |
|          | December 2015 | 12  | 6  | 50   | NC                                             |               |
|          | March 2016    | 226 | 3  | 1.3  | <b>J016</b>                                    | <b>0.023</b>  |
|          | July 2016     | 227 | 4  | 3.1  | J005, J006, J011, J009, J012, J022, J004, J018 | 0.357         |
| <b>J</b> | October 2016  | 82  | 10 | 12.2 | J007, J009                                     | 0.66          |
|          |               |     |    |      | J005, J011                                     | 0.72          |
|          | November 2016 | 101 | 23 | 22.8 | J017                                           | 0.265         |
|          |               |     |    |      | J005                                           | 0.963         |
|          |               |     |    |      | J027                                           | 0.974         |
|          | December 2016 | 232 | 19 | 8.2  | <b>J027</b>                                    | <b>0.0054</b> |
|          |               |     |    |      | J022                                           | 0.841         |
|          |               |     |    |      | J003                                           | 0.996         |
|          |               |     |    |      | J028                                           | 0.996         |
|          |               |     |    |      | J015                                           | 0.999         |

510 *P. falciparum* infections clusters were identified using Bernoulli spatial scan analysis method in SaTScan version 10.1.2.  
511 NC: no cluster identified. In bold, the group with a significantly higher prevalence of *Plasmodium* infection ( $p < 0.05$ )  
512 compared to other households at a given time
